# Supplementary material for: Sulphadoxine-pyrimethamine plus azithromycin may improve birth outcomes through impacts on inflammation and placental angiogenesis independent of malarial infection
Source: PubMed Central journal article supplement (PMC6381158; doi:10.1038/s41598-019-38821-2), 2019-02-19

Title: Sulphadoxine-pyrimethamine plus azithromycin may improve birth outcomes through impacts on inflammation and placental angiogenesis independent of malarial infection

Authors:

Holger W. UNGER PhD<sup>1</sup>

Annjaleen P. HANSA MBBS<sup>1,2</sup>

Christelle BUFFET MSc<sup>1</sup>

Wina HASANG BSc<sup>1</sup>

Andrew TEO PhD<sup>1</sup>

Louise RANDALL PhD<sup>1</sup>

Maria OME KAIUS MBBS<sup>3,4,5</sup>

Stephan KARL<sup>3,4,5,6</sup>

Ayen A. ANUAN BSc<sup>1</sup>

James G. BEESON PhD<sup>1,2,7</sup>

Ivo MUELLER PhD<sup>4,5,8</sup>

Sarah J STOCK PhD<sup>9</sup>

Stephen J. ROGERSON FRACP<sup>1</sup>

<sup>1</sup>Department of Medicine at the Doherty Institute, University of Melbourne, Parkville, Victoria, Australia

<sup>2</sup>Central Clinical School and Department of Microbiology, Monash University, Victoria, Australia

<sup>3</sup>Papua New Guinea Institute of Medical Research, Goroka, Papua New Guinea

<sup>4</sup>Walter and Eliza Hall Institute, Parkville, Victoria, Australia

<sup>5</sup>Department of Medical Biology, University of Melbourne, Parkville, Victoria, Australia

<sup>6</sup>Australian Institute of Tropical Health and Medicine, James Cook University, Cairns, Australia

<sup>7</sup>Burnet Institute, Melbourne, Victoria, Australia

<sup>8</sup>Institut Pasteur, Paris, France

<sup>9</sup>Tommy's Centre for Maternal and Fetal Health, MRC Centre for Reproductive Health, Queen's Medical Research Institute, Edinburgh, UK

**Supplemental File 1: STROBE Statement—checklist of items that should be included in reports of observational studies**

|                              | <b>Item<br/>No</b> | <b>Recommendation</b>                                                                                                                                                                                                                                                                                                                                                                                                                                                                                                                                                                                                                                                                                                                                                   |
|------------------------------|--------------------|-------------------------------------------------------------------------------------------------------------------------------------------------------------------------------------------------------------------------------------------------------------------------------------------------------------------------------------------------------------------------------------------------------------------------------------------------------------------------------------------------------------------------------------------------------------------------------------------------------------------------------------------------------------------------------------------------------------------------------------------------------------------------|
| <b>Title and abstract</b>    | 1                  | <p>(a) Indicate the study’s design with a commonly used term in the title or the abstract<br/> <b>Included in title (cohort study first and foremost)</b></p> <p>(b) Provide in the abstract an informative and balanced summary of what was done and what was found<br/> <b>Abstract</b></p>                                                                                                                                                                                                                                                                                                                                                                                                                                                                           |
| <b>Introduction</b>          |                    |                                                                                                                                                                                                                                                                                                                                                                                                                                                                                                                                                                                                                                                                                                                                                                         |
| Background/rationale         | 2                  | <p>Explain the scientific background and rationale for the investigation being reported<br/> <b>Introduction</b></p>                                                                                                                                                                                                                                                                                                                                                                                                                                                                                                                                                                                                                                                    |
| Objectives                   | 3                  | <p>State specific objectives, including any prespecified hypotheses<br/> <b>Introduction, last paragraph</b></p>                                                                                                                                                                                                                                                                                                                                                                                                                                                                                                                                                                                                                                                        |
| <b>Methods</b>               |                    |                                                                                                                                                                                                                                                                                                                                                                                                                                                                                                                                                                                                                                                                                                                                                                         |
| Study design                 | 4                  | <p>Present key elements of study design early in the paper<br/> <b>Methods, first paragraph</b></p>                                                                                                                                                                                                                                                                                                                                                                                                                                                                                                                                                                                                                                                                     |
| Setting                      | 5                  | <p>Describe the setting, locations, and relevant dates, including periods of recruitment, exposure, follow-up, and data collection<br/> <b>Methods, second paragraph. Parent trial paper.</b></p>                                                                                                                                                                                                                                                                                                                                                                                                                                                                                                                                                                       |
| Participants                 | 6                  | <p>(a) <i>Cohort study</i>—Give the eligibility criteria, and the sources and methods of selection of participants. Describe methods of follow-up<br/> <i>Case-control study</i>—Give the eligibility criteria, and the sources and methods of case ascertainment and control selection. Give the rationale for the choice of cases and controls<br/> <i>Cross-sectional study</i>—Give the eligibility criteria, and the sources and methods of selection of participants<br/> <b>Methods, second paragraph. Parent trial paper.</b></p> <p>(b) <i>Cohort study</i>—For matched studies, give matching criteria and number of exposed and unexposed<br/> <i>Case-control study</i>—For matched studies, give matching criteria and the number of controls per case</p> |
| Variables                    | 7                  | <p>Clearly define all outcomes, exposures, predictors, potential confounders, and effect modifiers. Give diagnostic criteria, if applicable<br/> <b>Methods, statistical analyses</b></p>                                                                                                                                                                                                                                                                                                                                                                                                                                                                                                                                                                               |
| Data sources/<br>measurement | 8*                 | <p>For each variable of interest, give sources of data and details of methods of assessment (measurement). Describe comparability of assessment methods if there is more than one group<br/> <b>Methods</b></p>                                                                                                                                                                                                                                                                                                                                                                                                                                                                                                                                                         |
| Bias                         | 9                  | <p>Describe any efforts to address potential sources of bias<br/> <b>Methods, statistical analyses</b></p>                                                                                                                                                                                                                                                                                                                                                                                                                                                                                                                                                                                                                                                              |
| Study size                   | 10                 | <p>Explain how the study size was arrived at<br/> <b>Methods, second paragraph</b></p>                                                                                                                                                                                                                                                                                                                                                                                                                                                                                                                                                                                                                                                                                  |
| Quantitative variables       | 11                 | <p>Explain how quantitative variables were handled in the analyses. If applicable, describe which groupings were chosen and why<br/> <b>Methods, statistical analyses</b></p>                                                                                                                                                                                                                                                                                                                                                                                                                                                                                                                                                                                           |
| Statistical methods          | 12                 | <p>(a) Describe all statistical methods, including those used to control for confounding<br/> <b>Methods, statistical analyses</b></p>                                                                                                                                                                                                                                                                                                                                                                                                                                                                                                                                                                                                                                  |

(b) Describe any methods used to examine subgroups and interactions

**Methods, statistical analyses**

(c) Explain how missing data were addressed

**Methods, statistical analyses**

(d) *Cohort study*—If applicable, explain how loss to follow-up was addressed

**Original trial paper.**

*Case-control study*—If applicable, explain how matching of cases and controls was addressed

*Cross-sectional study*—If applicable, describe analytical methods taking account of sampling strategy

(e) Describe any sensitivity analyses

**Results**

|                  |     |                                                                                                                                                                                                                                                                                                                                                                                                                                                                                                                                                                                     |
|------------------|-----|-------------------------------------------------------------------------------------------------------------------------------------------------------------------------------------------------------------------------------------------------------------------------------------------------------------------------------------------------------------------------------------------------------------------------------------------------------------------------------------------------------------------------------------------------------------------------------------|
| Participants     | 13* | (a) Report numbers of individuals at each stage of study—eg numbers potentially eligible, examined for eligibility, confirmed eligible, included in the study, completing follow-up, and analysed<br><b>Results, Figure 1, parent trial paper.</b><br>(b) Give reasons for non-participation at each stage<br><b>Results, Figure 1, parent trial paper.</b><br>(c) Consider use of a flow diagram<br><b>Figure 1</b>                                                                                                                                                                |
| Descriptive data | 14* | (a) Give characteristics of study participants (eg demographic, clinical, social) and information on exposures and potential confounders<br><b>Table 1</b><br>(b) Indicate number of participants with missing data for each variable of interest<br><b>Table 1, results.</b><br>(c) <i>Cohort study</i> —Summarise follow-up time (eg, average and total amount)<br><b>Until delivery/known pregnancy outcome. Parent trial paper.</b>                                                                                                                                             |
| Outcome data     | 15* | <i>Cohort study</i> —Report numbers of outcome events or summary measures over time<br><b>Tables 1&amp;2, results.</b><br><i>Case-control study</i> —Report numbers in each exposure category, or summary measures of exposure<br><i>Cross-sectional study</i> —Report numbers of outcome events or summary measures                                                                                                                                                                                                                                                                |
| Main results     | 16  | (a) Give unadjusted estimates and, if applicable, confounder-adjusted estimates and their precision (eg, 95% confidence interval). Make clear which confounders were adjusted for and why they were included<br><b>Methods, statistical analyses. Results, Tables 1-3, Supp Tables 1&amp;2.</b><br>(b) Report category boundaries when continuous variables were categorized<br><b>Methods, statistical analyses. Results, Tables 1-3, Supp Tables 1&amp;2.</b><br>(c) If relevant, consider translating estimates of relative risk into absolute risk for a meaningful time period |
| Other analyses   | 17  | Report other analyses done—eg analyses of subgroups and interactions, and sensitivity analyses<br><b>Methods, Results.</b>                                                                                                                                                                                                                                                                                                                                                                                                                                                          |

**Discussion**

|                  |    |                                                                                                                                                                                                                                             |
|------------------|----|---------------------------------------------------------------------------------------------------------------------------------------------------------------------------------------------------------------------------------------------|
| Key results      | 18 | Summarise key results with reference to study objectives<br><b>Discussion, Principal findings.</b>                                                                                                                                          |
| Limitations      | 19 | Discuss limitations of the study, taking into account sources of potential bias or imprecision. Discuss both direction and magnitude of any potential bias<br><b>Discussion, Strengths and limitations</b>                                  |
| Interpretation   | 20 | Give a cautious overall interpretation of results considering objectives, limitations, multiplicity of analyses, results from similar studies, and other relevant evidence<br><b>Discussion, Meaning and implication of study findings.</b> |
| Generalisability | 21 | Discuss the generalisability (external validity) of the study results<br><b>Discussion</b>                                                                                                                                                  |

**Other information**

Funding 22 Give the source of funding and the role of the funders for the present study and, if applicable, for the original study on which the present article is based  
**Funding declaration**

\*Give information separately for cases and controls in case-control studies and, if applicable, for exposed and unexposed groups in cohort and cross-sectional studies.

**Note:** An Explanation and Elaboration article discusses each checklist item and gives methodological background and published examples of transparent reporting. The STROBE checklist is best used in conjunction with this article (freely available on the Web sites of PLoS Medicine at <http://www.plosmedicine.org/>, Annals of Internal Medicine at <http://www.annals.org/>, and Epidemiology at <http://www.epidem.com/>). Information on the STROBE Initiative is available at [www.strobe-statement.org](http://www.strobe-statement.org).

**Supplemental Table 1** Association of maternal clinical factors at enrolment and delivery with AGP ( $\alpha$ -1-Acid glycoprotein) and CRP (C-reactive protein) levels at the time of clinical assessment

|                                                         | CRP (mg/L)     |                | <i>P</i> | AGP (mg/L)     |                | <i>P</i> |
|---------------------------------------------------------|----------------|----------------|----------|----------------|----------------|----------|
|                                                         | Yes            | No             |          | Yes            | No             |          |
| <i>Enrolment</i>                                        |                |                |          |                |                |          |
| Feeling unwell                                          | 2.7 (1.6, 4.4) | 1.4 [1.3, 1.5] | <0.001   | 265 (213, 329) | 220 [212, 228] | NS       |
| History of fever (last 24 hours)                        | 3.2 (1.9, 5.4) | 1.4 (1.3, 1.5) | <0.001   | 252 (206, 310) | 220 (212, 228) | NS       |
| Patient-reported malaria                                | 1.9 (1.5, 2.3) | 1.4 (1.3, 1.4) | 0.001    | 253 (228, 281) | 217 (209, 226) | 0.006    |
| Malaria infection <sup>a</sup>                          | 2.5 (2.0, 3.0) | 1.3 (1.2, 1.4) | <0.001   | 241 (217, 267) | 218 (210, 227) | NS       |
| Sexually transmitted infection <sup>b</sup>             | 1.5 (1.1, 2.1) | 1.3 (1.1, 1.6) | NS       | 198 (160, 244) | 189 (165, 217) | NS       |
| MUAC <23 cm                                             | 1.2 (1.1, 1.4) | 1.5 (1.4, 1.6) | 0.007    | 214 (200, 229) | 224 (214, 234) | NS       |
| MAP $\geq$ 90mmHg                                       | 1.3 (1.2, 1.5) | 1.4 (1.3, 1.5) | NS       | 239 (224, 255) | 216 (207, 225) | 0.020    |
| Haemoglobin <70 g/L                                     | 2.5 (1.7, 3.8) | 1.4 (1.3, 1.5) | <0.001   | 261 (217, 312) | 217 (209, 226) | NS       |
| <i>Delivery<sup>c</sup></i>                             |                |                |          |                |                |          |
| Peripheral malaria infection (any species) <sup>c</sup> | 2.5 (1.9, 3.3) | 1.1 (1.0, 1.2) | <0.001   | 187 (160, 219) | 167 (162, 173) | NS       |
| Placental malaria <sup>c</sup>                          | 2.3 (1.5, 3.5) | 1.0 (0.9, 1.1) | <0.001   | 165 (133, 204) | 162 (156, 168) | NS       |
| Active placental infection (histology)                  | 1.7 (1.2, 2.4) | 1.0 (0.9, 1.1) | <0.001   | 193 (167, 223) | 160 (153, 167) | 0.012    |
| Past placental infection (histology)                    | 1.3 (1.0, 1.7) | 0.9 (0.9, 1.0) | 0.020    | 151 (96, 134)  | 161 (155, 168) | NS       |

MAP, mean arterial pressure; MUAC, mid-upper arm circumference; NS, not significant, defined as  $p \geq 0.05$ . Data are presented as geometric mean (95% confidence interval).

<sup>a</sup> Peripheral parasitaemia by light microscopy and/or real-time polymerase chain reaction (*Plasmodium falciparum*, *P. vivax*).

<sup>b</sup> One or more of the following detected in self-collected low vaginal swab: *Trichomonas vaginalis*, *Chlamydia trachomatis*, *Neisseria gonorrhoeae* (n=309)

<sup>c</sup> Positive for infection by light microscopy and/or polymerase chain reaction (*P. falciparum*, *P. vivax*)

**Supplemental table 2** Association of maternal clinical factors at enrolment and delivery with levels of soluble endoglin (sEng), s-Flt-1 (soluble fms-like tyrosine kinase), PlGF (placental growth factor) and the sFlt-1/PlGF ratio at the time of clinical assessment.

|                                                         | sEng (pg/ml)      |                   |          | sFlt-1 (ng/ml)    |                   |          |
|---------------------------------------------------------|-------------------|-------------------|----------|-------------------|-------------------|----------|
|                                                         | Yes               | No                | <i>P</i> | Yes               | No                | <i>P</i> |
| <b>Enrolment</b>                                        |                   |                   |          |                   |                   |          |
| Feeling unwell                                          | 14.8 (12.5, 17.4) | 14.7 (14.2, 15.2) | NS       | 2.6 (2.1, 3.1)    | 2.6 (2.5, 2.7)    | NS       |
| History of fever (last 24 hours)                        | 14.3 (11.8, 17.3) | 14.7 (14.2, 15.2) | NS       | 2.4 (1.9, 2.9)    | 2.6 (2.5, 2.7)    | NS       |
| Patient-reported malaria                                | 15.3 (13.9, 16.7) | 14.6 (14.1, 15.2) | NS       | 2.6 (2.4, 2.9)    | 2.5 (2.5, 2.7)    | NS       |
| Malaria infection <sup>a</sup>                          | 15.8 (14.4, 17.2) | 14.6 (14.0, 15.1) | NS       | 2.3 (2.1, 2.5)    | 2.6 (2.5, 2.7)    | 0.017    |
| MUAC <23 cm                                             | 14.6 (13.7, 15.5) | 14.8 (14.2, 15.4) | NS       | 2.8 (2.6, 3.0)    | 2.5 (2.4, 2.6)    | 0.018    |
| MAP ≥90mmHg                                             | 16.3 (15.2, 17.4) | 14.3 (13.7, 14.8) | <0.001   | 2.5 (2.4, 2.7)    | 2.6 (2.5, 2.7)    | NS       |
| Haemoglobin <70 g/L                                     | 15.9 (13.4, 19.0) | 14.7 (14.2, 15.2) | NS       | 3.0 (2.4, 3.8)    | 2.5 (2.4, 2.6)    | NS       |
| <b>Delivery<sup>b</sup></b>                             |                   |                   |          |                   |                   |          |
| Peripheral malaria infection (any species) <sup>b</sup> | 21.9 (18.4, 26.1) | 22.9 (21.9, 23.9) | NS       | 4.8 (3.8, 5.9)    | 4.8 (4.5, 5.1)    | NS       |
| Placental malaria <sup>b</sup>                          | 24.7 (19.5, 31.4) | 23.5 (22.4, 24.6) | NS       | 5.6 (4.3, 7.3)    | 6.3 (5.9, 6.7)    | NS       |
| Active placental infection (histology)                  | 23.6 (19.6, 28.5) | 23.4 (22.2, 24.7) | NS       | 6.7 (5.4, 8.4)    | 6.2 (5.8, 6.6)    | NS       |
| Past placental infection (histology)                    | 18.9 (16.1, 31.7) | 24.1 (22.8, 25.4) | 0.003    | 4.9 (4.0, 6.0)    | 6.4 (5.9, 6.8)    | 0.013    |
|                                                         | PlGF (pg/ml)      |                   |          | sFlt-1/PlGF       |                   |          |
|                                                         | Yes               | No                | <i>P</i> | Yes               | No                | <i>P</i> |
| <b>Enrolment</b>                                        |                   |                   |          |                   |                   |          |
| Feeling unwell                                          | 123 (103, 155)    | 161 (155, 167)    | 0.017    | 20.4 (15.1, 27.7) | 16.0 (15.2, 16.8) | NS       |
| History of fever (last 24 hours)                        | 146 (120, 177)    | 160 (154, 166)    | NS       | 16.2 (12.2, 21.5) | 16.1 (15.3, 16.9) | NS       |
| Patient reported malaria                                | 153 (139, 169)    | 160 (154, 166)    | NS       | 17.2 (15.1, 19.6) | 16.0 (15.1, 16.8) | NS       |
| Malaria infection <sup>a</sup>                          | 141 (128, 154)    | 163 (156, 169)    | 0.006    | 16.3 (14.4, 18.5) | 16.1 (15.2, 16.9) | NS       |
| MUAC <23 cm                                             | 157 (146, 168)    | 160 (154, 167)    | NS       | 17.5 (16.0, 19.3) | 15.6 (14.7, 16.5) | 0.031    |
| MAP ≥90mmHg                                             | 157 (146, 169)    | 160 (154, 167)    | NS       | 16.2 (14.6, 17.8) | 16.1 (15.2, 17.0) | NS       |
| Haemoglobin <70 g/L                                     | 137 (115, 163)    | 160 (154, 166)    | NS       | 22.1 (17.0, 28.8) | 15.9 (15.0, 16.7) | 0.011    |
| <b>Delivery<sup>b</sup></b>                             |                   |                   |          |                   |                   |          |
| Peripheral malaria infection (any species) <sup>c</sup> | 74 (65, 84)       | 76 (73, 78)       | NS       | 64.4 (50.6, 82.0) | 63.6 (59.7, 67.9) | NS       |

|                                        |             |             |    |                    |                   |       |
|----------------------------------------|-------------|-------------|----|--------------------|-------------------|-------|
| Placental malaria <sup>b</sup>         | 80 (67, 96) | 80 (77, 82) | NS | 70.5 (50.4, 98.7)  | 78.6 (73.7, 84.0) | NS    |
| Active placental infection (histology) | 81 (71, 93) | 77 (74, 80) | NS | 83.1 (65.5, 105.4) | 80.3 (74.7, 86.3) | NS    |
| Past placental infection (histology)   | 79 (71, 89) | 77 (74, 80) | NS | 61.6 (49.4, 76.9)  | 83.2 (77.1, 89.8) | 0.008 |

MAP, mean arterial pressure; MUAC, mid-upper arm circumference; NS, not significant, defined as  $p \geq 0.05$ . Data are presented as geometric mean (95% confidence interval).

<sup>a</sup> Peripheral parasitaemia by light microscopy and/or real-time polymerase chain reaction (*Plasmodium falciparum*, *P. vivax*).

<sup>b</sup> Positive for infection by light microscopy and/or polymerase chain reaction (*P. falciparum*, *P. vivax*).

**Supplemental table 3** Biomarker levels at enrolment and birthweight, overall and by treatment arm

| Biomarker levels |                          | N     | Mean birthweight in g (95% CI) | Adjusted mean difference in BW (g) (95% CI) | P     |
|------------------|--------------------------|-------|--------------------------------|---------------------------------------------|-------|
| <b>Overall</b>   |                          |       |                                |                                             |       |
| CRP (mg/L)       |                          | 1,647 | 2951                           | 51 (-2, 104)                                | NS    |
|                  | Elevated ( $\geq 5.0$ )  | 365   | 2907                           |                                             |       |
| AGP (mg/L)       |                          | 1,509 | 2951                           | 34 (-14, 81)                                | NS    |
|                  | Elevated ( $\geq 360$ )  | 503   | 2918                           |                                             |       |
| sEng (pg/ml)     |                          | 1,509 | 2956                           | 38 (-9, 85)                                 | NS    |
|                  | Elevated ( $\geq 28.3$ ) | 503   | 2903                           |                                             |       |
| sFlt-1 (ng/ml)   |                          | 1,509 | 2955                           | 23 (-25, 70)                                | NS    |
|                  | Elevated ( $\geq 4.3$ )  | 503   | 2909                           |                                             |       |
| PlGF (pg/ml)     |                          | 1,509 | 2957                           | 47 (-2, 47)                                 | NS    |
|                  | Low ( $\leq 93.5$ )      | 503   | 2901                           |                                             |       |
| sFlt-1/PlGF      |                          | 1,509 | 2960                           | 45 (-3, 93)                                 | NS    |
|                  | Elevated ( $\geq 38$ )   | 503   | 2894                           |                                             |       |
| <b>SPCQ</b>      |                          |       |                                |                                             |       |
| CRP (mg/L)       |                          | 837   | 2937                           | 96 (13, 179)                                | 0.023 |
|                  | Elevated ( $\geq 5.0$ )  | 166   | 2842                           |                                             |       |
| AGP (mg/L)       |                          | 740   | 2927                           | 21 (-50, 92)                                | NS    |
|                  | Elevated ( $\geq 360$ )  | 240   | 2906                           |                                             |       |
| sEng (pg/ml)     |                          | 756   | 2936                           | 37 (-35, 109)                               | NS    |
|                  | Elevated ( $\geq 28.3$ ) | 247   | 2880                           |                                             |       |
| sFlt-1 (ng/ml)   |                          | 742   | 2944                           | 65 (-6, 135)                                | NS    |
|                  | Elevated ( $\geq 4.3$ )  | 261   | 2860                           |                                             |       |
| PlGF (pg/ml)     |                          | 748   | 2931                           | 38 (-35, 112)                               | NS    |
|                  | Low ( $\leq 93.5$ )      | 255   | 2897                           |                                             |       |
| sFlt-1/PlGF      |                          | 761   | 2941                           | 61 (-13, 134)                               | NS    |
|                  | Elevated ( $\geq 38$ )   | 242   | 2865                           |                                             |       |
| <b>SPAZ</b>      |                          |       |                                |                                             |       |
| CRP (mg/L)       |                          | 810   | 2965                           | 15 (-53, 83)                                | NS    |
|                  | Elevated ( $\geq 5.0$ )  | 199   | 2961                           |                                             |       |
| AGP (mg/L)       |                          | 769   | 2974                           | 43 (-21, 106)                               | NS    |
|                  | Elevated ( $\geq 360$ )  | 240   | 2964                           |                                             |       |
| sEng (pg/ml)     |                          | 753   | 2977                           | 40 (-22, 103)                               | NS    |
|                  | Elevated ( $\geq 28.3$ ) | 256   | 2928                           |                                             |       |
| sFlt-1 (ng/ml)   |                          | 767   | 2965                           | 18 (-45, 82)                                | NS    |



|              |                         |     |      |              |    |
|--------------|-------------------------|-----|------|--------------|----|
| PIGF (pg/ml) | Elevated ( $\geq 4.3$ ) | 242 | 2963 | 58 (-7, 123) | NS |
|              | Low ( $\leq 93.5$ )     | 761 | 2983 |              |    |
| sFlt-1/PIGF  | Low ( $\leq 93.5$ )     | 248 | 2905 | 35 (-28, 97) | NS |
|              | Elevated ( $\geq 38$ )  | 748 | 2979 |              |    |
|              |                         | 261 | 2921 |              |    |

*AGP*,  $\alpha$ -1-Acid glycoprotein; *aOR*, adjusted odds ratio; *CI*, confidence interval; *CRP*, C-reactive protein; *PIGF*, placental growth factor; *sEng*, soluble endoglin; *sFlt-1*, soluble fms-like tyrosine kinase; *SPCQ*, sulfadoxine-pyrimethamine plus chloroquine; *SPAZ*, sulfadoxine-pyrimethamine plus azithromycin. *NS*, not significant, defined as  $p \geq 0.05$ .

<sup>a</sup> Odds ratios and 95% confidence intervals were estimated using logistic regression and adjusted for sex, bed net use, mid-upper arm circumference, recruitment clinic, height, partner's work status, number of antenatal visits, timing of birthweight measurement, and fundal height at biomarker measurement

<sup>b</sup> Odds ratios and 95% confidence intervals were estimated using logistic regression and adjusted for sex, bed net use, mid-upper arm circumference, recruitment clinic, height, partner's work status, number of antenatal visits, and gestational age at biomarker measurement by ultrasound

**Supplemental Table 4** Adjusted odds ratios (aOR) for biomarker levels at enrolment (log-transformed) and adverse birth outcomes, overall and by trial arm, in women without detectable *Plasmodium falciparum/P. vivax* infection.

| Outcome                            | SPCQ              |       | SPAZ              |      | All               |       |
|------------------------------------|-------------------|-------|-------------------|------|-------------------|-------|
|                                    | aOR (95% CI)      | P     | aOR (95% CI)      | P    | aOR (95% CI)      | P     |
| <b>Low birthweight<sup>a</sup></b> | <b>128/744</b>    |       | <b>103/796</b>    |      | <b>231/1,540</b>  |       |
| CRP (mg/L)                         | 1.10 (0.80, 1.51) | 0.56  | 1.00 (0.70, 1.44) | 1.00 | 1.04 (0.82, 1.32) | 0.73  |
| AGP (mg/L)                         | 0.86 (0.50, 1.50) | 0.60  | 1.66 (0.87, 3.16) | 0.13 | 1.15 (0.76, 1.74) | 0.51  |
| sEng (pg/ml)                       | 1.47 (0.78, 2.78) | 0.23  | 1.38 (0.72, 2.67) | 0.33 | 1.45 (0.93, 2.28) | 0.10  |
| sFlt-1 (ng/ml)                     | 1.39 (0.83, 2.35) | 0.21  | 1.86 (0.97, 3.57) | 0.06 | 1.53 (1.02, 2.29) | 0.041 |
| PIGF (pg/ml)                       | 0.64 (0.35, 1.16) | 0.14  | 0.78 (0.41, 1.48) | 0.44 | 0.70 (0.45, 1.08) | 0.11  |
| sFlt-1/PIGF                        | 1.56 (1.02, 2.37) | 0.039 | 1.58 (0.99, 2.54) | 0.06 | 1.54 (1.13, 2.10) | 0.006 |
| <b>Preterm birth<sup>b</sup></b>   | <b>51/484</b>     |       | <b>34/521</b>     |      | <b>85/1,005</b>   |       |
| CRP (mg/L)                         | 2.30 (1.39, 3.79) | 0.001 | 0.80 (0.43, 1.47) | 0.46 | 1.45 (0.99, 2.12) | 0.06  |
| AGP (mg/L)                         | 1.17 (0.49, 2.78) | 0.72  | 0.90 (0.33, 2.44) | 0.84 | 1.03 (0.55, 1.96) | 0.92  |
| sEng (pg/ml)                       | 3.77 (1.32, 10.7) | 0.013 | 0.61 (0.19, 1.94) | 0.40 | 1.70 (0.82, 3.56) | 0.16  |
| sFlt-1 (ng/ml)                     | 2.50 (1.10, 5.60) | 0.029 | 1.68 (0.63, 4.50) | 0.31 | 2.08 (0.11, 3.89) | 0.02  |
| PIGF (pg/ml)                       | 1.92 (0.73, 5.08) | 0.19  | 0.55 (0.17, 1.75) | 0.31 | 1.14 (0.55, 2.37) | 0.73  |
| sFlt-1/PIGF                        | 1.33 (0.70, 2.51) | 0.38  | 1.72 (0.82, 3.60) | 0.15 | 1.46 (0.90, 2.35) | 0.13  |
| <b>SGA<sup>b</sup></b>             | <b>120/484</b>    |       | <b>120/521</b>    |      | <b>240/1,005</b>  |       |
| CRP (mg/L)                         | 1.09 (0.77, 1.53) | 0.64  | 0.97 (0.68, 1.39) | 0.88 | 1.02 (0.80, 1.30) | 0.89  |
| AGP (mg/L)                         | 0.98 (0.56, 1.74) | 0.95  | 1.42 (0.78, 2.57) | 0.25 | 1.18 (0.79, 1.78) | 0.42  |
| sEng (pg/ml)                       | 0.75 (0.39, 1.45) | 0.39  | 1.02 (0.52, 2.00) | 0.95 | 0.89 (0.56, 1.42) | 0.63  |
| sFlt-1 (ng/ml)                     | 0.89 (0.50, 1.60) | 0.70  | 1.15 (0.63, 2.11) | 0.65 | 1.01 (0.65, 1.52) | 0.97  |
| PIGF (pg/ml)                       | 0.53 (0.25, 1.11) | 0.09  | 0.55 (0.27, 1.11) | 0.10 | 0.56 (0.34, 0.94) | 0.026 |
| sFlt-1/PIGF                        | 1.20 (0.76, 1.92) | 0.44  | 1.42 (0.89, 2.25) | 0.14 | 1.28 (0.92, 1.77) | 0.14  |

AGP,  $\alpha$ -1-acid glycoprotein; CI, confidence interval; CRP, C-reactive protein; PIGF, placental growth factor; sEng, soluble endoglin; sFlt-1, soluble fms-like tyrosine kinase; SPCQ, sulphadoxine-pyrimethamine plus chloroquine; SPAZ, sulphadoxine-pyrimethamine plus azithromycin. NS, not significant, defined as  $p \geq 0.05$ .

<sup>a</sup> Odds ratios and 95% confidence intervals were estimated using logistic regression and adjusted for sex, bed net use, mid-upper arm circumference, recruitment clinic, height, partner's work status, number of antenatal visits, timing of birthweight measurement, and fundal height at biomarker measurement

<sup>b</sup> Odds ratios and 95% confidence intervals were estimated using logistic regression and adjusted for sex, bed net use, mid-upper arm circumference, recruitment clinic, height, partner's work status, number of antenatal visits, and gestational age at biomarker measurement by ultrasound

**Supplemental Table 5** Adjusted odds ratios (aOR) for biomarker levels at delivery (log-transformed) and adverse birth outcomes, overall and by trial arm, in women without detectable *Plasmodium falciparum/P. vivax* infection.

| Outcome                            | SPCQ              |        | SPAZ              |       | All               |       |
|------------------------------------|-------------------|--------|-------------------|-------|-------------------|-------|
|                                    | aOR (95% CI)      | P      | aOR (95% CI)      | P     | aOR (95% CI)      | P     |
| <b>Low birthweight<sup>a</sup></b> | <b>122/712</b>    |        | <b>99/769</b>     |       | <b>221/1,481</b>  |       |
| CRP (mg/L)                         | 1.21 (0.90, 1.66) | 0.21   | 0.90 (0.64, 1.27) | 0.56  | 1.09 (0.87, 1.36) | 0.47  |
| AGP (mg/L)                         | 2.47 (1.29, 4.73) | 0.007  | 1.92 (0.97, 3.80) | 0.06  | 2.16 (1.36, 3.45) | 0.001 |
| sEng (pg/ml)                       | 2.34 (1.31, 4.20) | 0.004  | 2.03 (1.07, 3.84) | 0.030 | 2.15 (1.40, 3.29) | 0.001 |
| sFlt-1 (ng/ml)                     | 1.29 (0.66, 2.54) | 0.46   | 0.95 (0.44, 2.04) | 0.90  | 1.24 (0.76, 2.01) | 0.39  |
| PIGF (pg/ml)                       | 0.50 (0.24, 1.05) | 0.07   | 0.57 (0.25, 1.27) | 0.17  | 0.53 (0.31, 0.91) | 0.021 |
| sFlt-1/PIGF                        | 1.16 (0.81, 1.65) | 0.43   | 1.70 (1.10, 2.63) | 0.017 | 1.34 (1.02, 1.76) | 0.036 |
| <b>Preterm birth<sup>b</sup></b>   | <b>50/464</b>     |        | <b>33/505</b>     |       | <b>83/969</b>     |       |
| CRP (mg/L)                         | 1.42 (0.87, 2.32) | 0.16   | 0.52 (0.28, 0.95) | 0.035 | 0.99 (0.69, 1.42) | 0.95  |
| AGP (mg/L)                         | 4.27 (1.53, 11.7) | 0.005  | 1.35 (0.45, 4.01) | 0.59  | 2.47 (1.20, 5.07) | 0.014 |
| sEng (pg/ml)                       | 3.02 (1.26, 7.22) | 0.013  | 3.90 (1.24, 12.3) | 0.020 | 3.06 (1.55, 6.07) | 0.001 |
| sFlt-1 (ng/ml)                     | 0.99 (0.57, 1.71) | 0.97   | 1.82 (0.83, 3.97) | 0.13  | 1.23 (0.79, 1.90) | 0.37  |
| PIGF (pg/ml)                       | 0.29 (0.09, 0.97) | 0.045  | 0.49 (0.12, 1.98) | 0.32  | 0.34 (0.14, 0.86) | 0.02  |
| sFlt-1/PIGF                        | 1.30 (0.77, 2.20) | 0.33   | 1.92 (0.96, 3.86) | 0.07  | 1.51 (1.00, 2.28) | 0.05  |
| <b>SGA<sup>b</sup></b>             | <b>117/464</b>    |        | <b>117/505</b>    |       | <b>234/969</b>    |       |
| CRP (mg/L)                         | 1.31 (0.94, 1.82) | 0.11   | 0.97 (0.70, 1.35) | 0.86  | 1.12 (0.89, 1.41) | 0.35  |
| AGP (mg/L)                         | 3.94 (1.91, 8.14) | <0.001 | 1.41 (0.75, 2.66) | 0.29  | 2.22 (1.39, 3.56) | 0.001 |
| sEng (pg/ml)                       | 1.82 (1.04, 3.18) | 0.035  | 1.19 (0.70, 2.02) | 0.53  | 1.44 (0.98, 2.10) | 0.06  |
| sFlt-1 (ng/ml)                     | 1.24 (0.84, 1.82) | 0.29   | 1.19 (0.78, 1.82) | 0.42  | 1.20 (0.91, 1.60) | 0.20  |
| PIGF (pg/ml)                       | 0.98 (0.48, 2.02) | 0.96   | 0.82 (0.38, 1.77) | 0.62  | 0.93 (0.55, 1.56) | 0.78  |
| sFlt-1/PIGF                        | 1.21 (0.84, 1.74) | 0.31   | 1.23 (0.83, 1.81) | 0.31  | 1.20 (0.92, 1.56) | 0.18  |

AGP,  $\alpha$ -1-Acid glycoprotein; CI, confidence interval; CRP, C-reactive protein; PIGF, placental growth factor; sEng, soluble endoglin; sFlt-1, soluble fms-like tyrosine kinase; SPCQ, sulphadoxine-pyrimethamine plus chloroquine; SPAZ, sulphadoxine-pyrimethamine plus azithromycin. NS, not significant, defined as  $p \geq 0.05$ .

<sup>a</sup> Odds ratios and 95% confidence intervals were estimated using logistic regression and adjusted for sex, bed net use, mid-upper arm circumference, recruitment clinic, height, partner's work status, number of antenatal visits, and timing of birthweight measurement

<sup>b</sup> Odds ratios and 95% confidence intervals were estimated using logistic regression and adjusted for sex, bed net use, mid-upper arm circumference, recruitment clinic, height, partner's work status, and number of antenatal visits

**Supplemental Table 6** Diagnostic characteristics of biomarkers for the detection of low birthweight (<2,500 g), spontaneous preterm birth (PTB, <37 weeks) and birthweight <10 birthweight centile (SGA) among women randomised to SPCQ

| <b>LBW</b> | <b>Prevalence:</b> | 17.5% (15.0, 19.9) |                       | 175/1003             |                      |                                    |                                    |      |      |
|------------|--------------------|--------------------|-----------------------|----------------------|----------------------|------------------------------------|------------------------------------|------|------|
|            | AUC                | Youden Index (YI)  | Biomarker level at YI | Sensitivity (95% CI) | Specificity (95% CI) | Positive predictive value (95% CI) | Negative predictive value (95% CI) | +LR  | -LR  |
| <b>LBW</b> |                    |                    |                       |                      |                      |                                    |                                    |      |      |
| CRP        | 0.5186             | 0.08               | 6.1 mg/L              | 18.3 (12.9, 24.8)    | 88.2 (85.8, 90.3)    | 24.6 (17.5, 32.9)                  | 83.6 (81.0, 86.0)                  | 1.54 | 0.93 |
| AGP        | 0.5067             | 0.06               | 265 mg/L              | 37.7 (30.5, 45.3)    | 56.3 (52.8, 59.7)    | 15.4 (12.1, 19.2)                  | 81.0 (77.6, 84.2)                  | 0.86 | 1.11 |
| sEng       | 0.5693             | 0.13               | 21.5 pg/mL            | 49.7 (42.1, 57.4)    | 62.3 (58.9, 65.6)    | 21.8 (17.8, 26.2)                  | 85.4 (82.4, 88.1)                  | 1.32 | 0.81 |
| sFlt-1     | 0.5356             | 0.10               | 4.2 ng/mL             | 35.4 (28.4, 43.0)    | 74.6 (71.5, 77.6)    | 22.8 (17.9, 28.2)                  | 84.5 (81.7, 87.1)                  | 1.40 | 0.87 |
| PIGF       | 0.5264             | 0.07               | 336 pg/ml             | 13.7 (9.0, 19.7)     | 80.1 (77.2, 82.7)    | 12.7 (8.3, 18.3)                   | 81.4 (78.6, 84.1)                  | 1.08 | 0.64 |
| sFlt1/PGF  | 0.5472             | 0.10               | 29.9                  | 35.4 (28.4, 43.0)    | 74.0 (70.9, 77.0)    | 22.4 (17.6, 27.8)                  | 84.4 (81.6, 87.0)                  | 1.36 | 0.87 |
|            |                    |                    |                       |                      |                      |                                    |                                    |      |      |
| <b>PTB</b> |                    | 10.6% (8.4, 13.3)  |                       | 69/649               |                      |                                    |                                    |      |      |
| CRP        | 0.5678             | 0.14               | 6.6 mg/L              | 21.7 (12.7, 33.3)    | 90.7 (88.0, 92.8)    | 21.7 (12.7, 33.3)                  | 90.7 (88.0, 92.9)                  | 2.33 | 0.86 |
| AGP        | 0.5327             | 0.13               | 244 mg/L              | 58.0 (45.5, 69.8)    | 53.3 (49.1, 57.4)    | 12.9 (9.4, 17.1)                   | 91.4 (87.9, 94.2)                  | 1.24 | 0.79 |
| sEng       | <b>0.6310</b>      | 0.22               | 25.3 pg/mL            | 49.3 (37.0, 61.6)    | 71.4 (67.5, 75.0)    | 17.0 (12.1, 22.9)                  | 92.2 (89.3, 94.5)                  | 1.72 | 0.71 |
| sFlt-1     | 0.6072             | 0.21               | 2.7 ng/mL             | 65.2 (52.8, 76.3)    | 55.3 (51.2, 59.4)    | 14.8 (11.0, 19.3)                  | 93.0 (89.8, 95.5)                  | 1.46 | 0.63 |
| PIGF       | 0.5240             | 0.11               | 60.6 pg/ml            | 95.7 (87.8, 99.1)    | 13.4 (10.8, 16.5)    | 11.6 (9.1, 14.5)                   | 96.3 (89.6, 99.2)                  | 1.11 | 0.32 |
| sFlt1/PGF  | 0.5539             | 0.12               | 14.4                  | 63.8 (51.3, 75.0)    | 47.1 (42.9, 51.2)    | 12.5 (9.3, 1.5)                    | 91.6 (87.9, 84.5)                  | 1.20 | 0.77 |
|            |                    |                    |                       |                      |                      |                                    |                                    |      |      |
| <b>SGA</b> |                    | 25.1% (22.0, 28.6) |                       | 163/649              |                      |                                    |                                    |      |      |
| CRP        | 0.4960             | 0.05               | 1.3 mg/L              | 47.9 (40.0, 55.8)    | 56.0 (51.4, 60.4)    | 26.7 (21.7, 32.2)                  | 76.2 (71.4, 80.5)                  | 1.09 | 0.93 |
| AGP        | 0.5135             | 0.05               | 406 mg/L              | 23.9 (17.6, 31.2)    | 80.7 (76.9, 84.1)    | 29.3 (21.8, 37.8)                  | 76.0 (72.0, 79.6)                  | 1.24 | 0.94 |
| sEng       | 0.5078             | 0.06               | 11.1 pg/mL            | 65.0 (57.2, 72.3)    | 40.9 (36.5, 45.5)    | 27.0 (22.6, 31.6)                  | 77.7 (72.1, 82.7)                  | 1.1  | 0.85 |
| sFlt-1     | 0.5120             | 0.07               | 1.2 ng/mL             | 79.8 (72.8, 85.6)    | 13.6 (10.7, 17.0)    | 23.6 (20.1, 27.4)                  | 66.7 (56.5, 75.8)                  | 0.92 | 1.49 |
| PIGF       | 0.5624             | 0.13               | 80.3 pg/ml            | 74.2 (66.8, 80.8)    | 13.6 (10.7, 17.0)    | 22.4 (18.9, 26.1)                  | 61.1 (51.3, 70.3)                  | 0.86 | 1.90 |
| sFlt1/PGF  | 0.5382             | 0.09               | 38.9                  | 26.4 (19.8, 33.8)    | 82.1 (78.4, 85.4)    | 33.1 (25.1, 41.9)                  | 76.9 (73.0, 80.4)                  | 1.47 | 0.90 |

AGP,  $\alpha$ -1-Acid glycoprotein; AUC, area under the curve (receiver-operator curve); CI, confidence interval; CRP, C-reactive protein; LR, likelihood ratio; PIGF, placental growth factor; sEng, soluble endoglin; sFlt-1, soluble fms-like tyrosine kinase; SPCQ; sulfadoxine-pyrimethamine plus chloroquine.

The best combination for prediction of PTB is sEng, sFlt-1 and maternal mid-upper arm circumference, which provides an AUC of 0.686.

**Supplemental Figure 1.** Comparison of levels of  $\alpha$ -1-acid glycoprotein (AGP) between treatment arms by gestational age (GA) groupings.

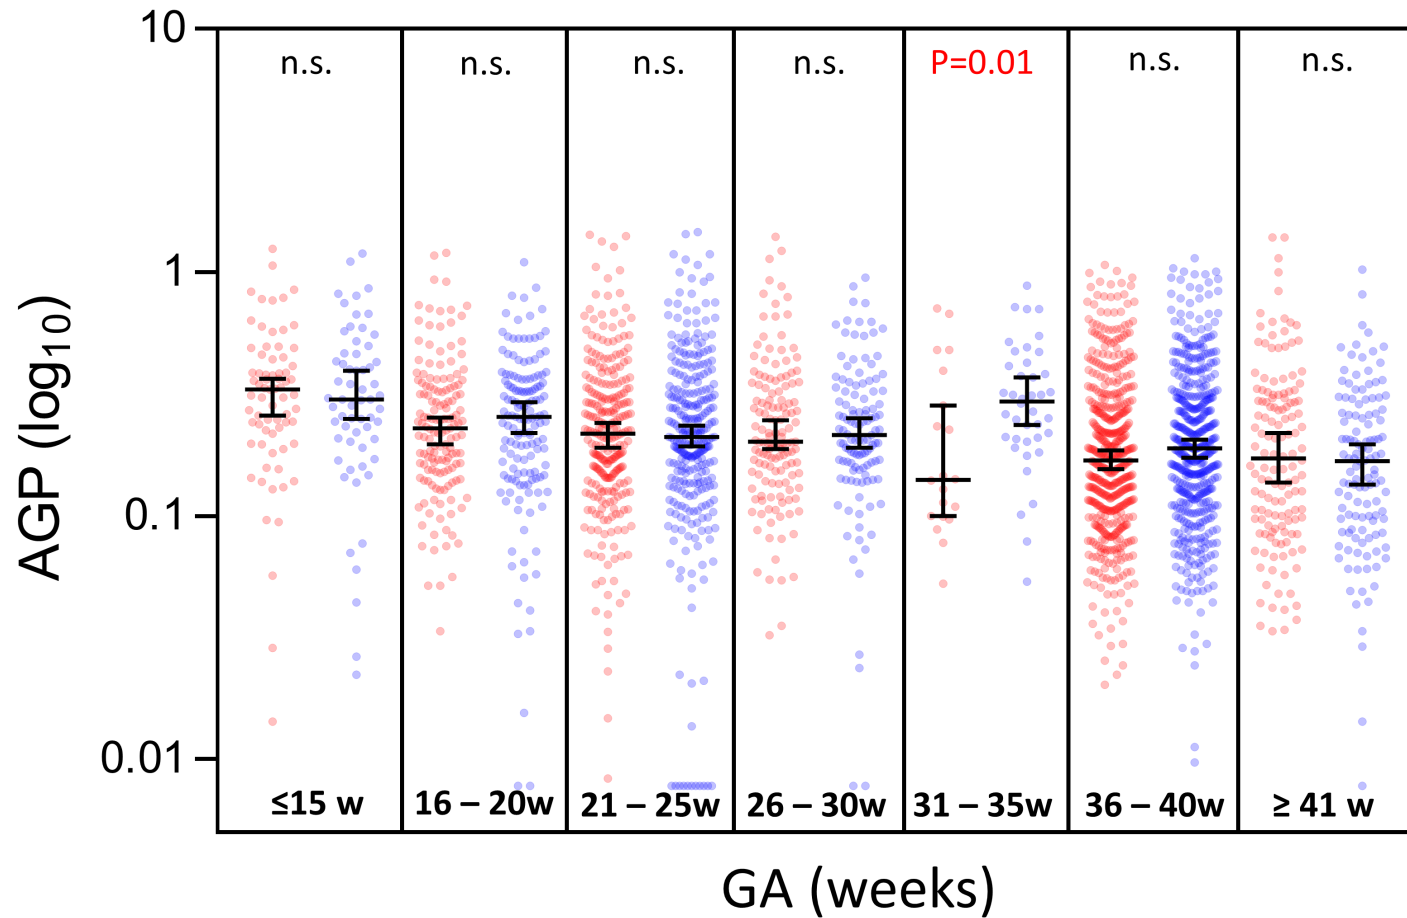

Supplement: 41598_2019_38821_MOESM1_ESM.pdf [file 41598_2019_38821_MOESM1_ESM.pdf]
